# Supplementary material for: Development of a decentralized cohort for studying post-acute sequelae of COVID-19 in India in the Data4life Study
Source: PubMed Central journal article supplement (PMC10457339; doi:10.1038/s43856-023-00349-y), 2023-08-25
Supplement: 43856_2023_349_MOESM1_ESM.pdf [file 43856_2023_349_MOESM1_ESM.pdf]

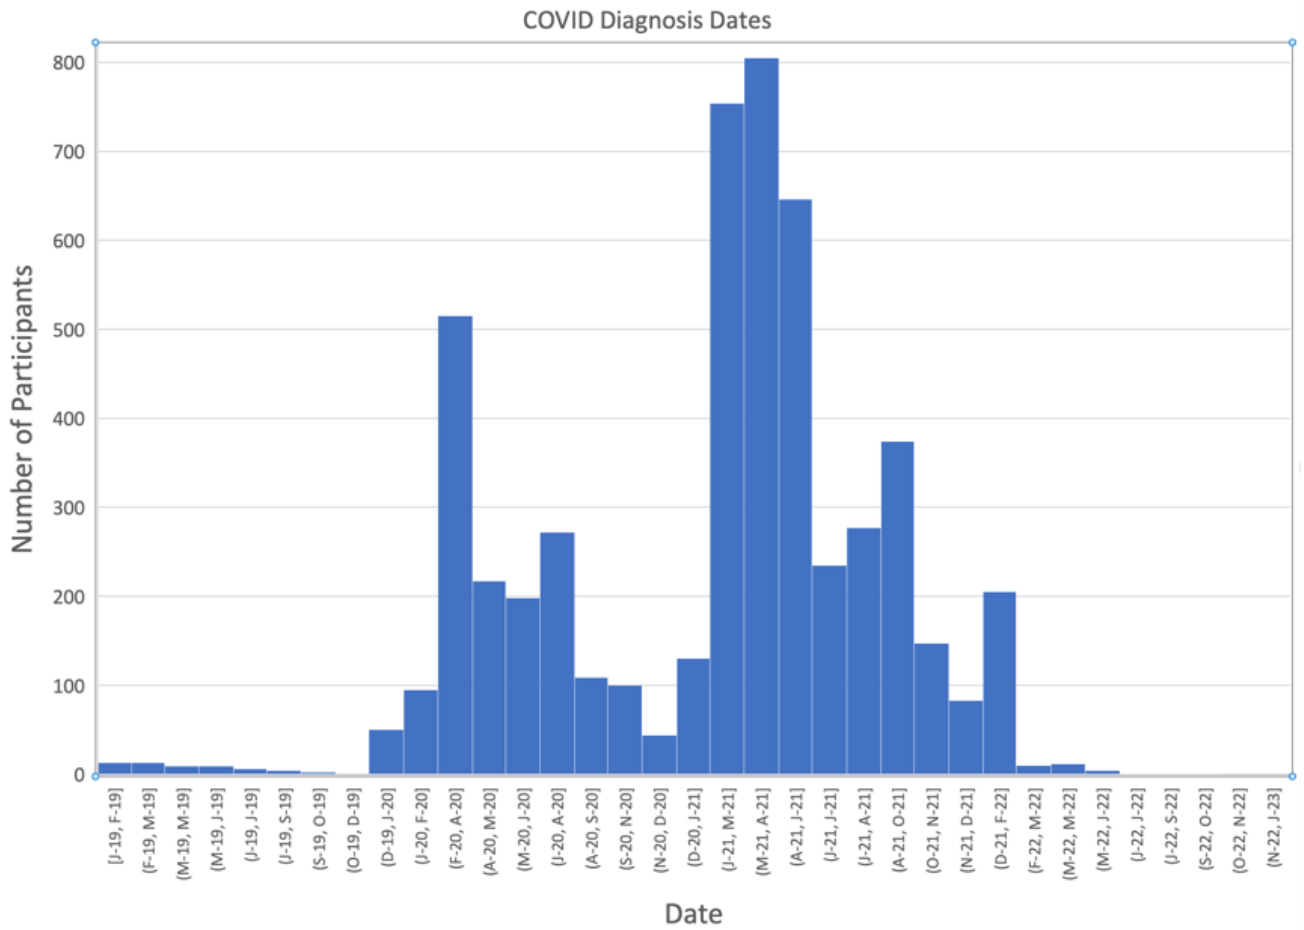

**Supplementary Figure 1: Distribution of Data4life participants' COVID-19 diagnosis dates.** The x axis indicates the dates and the y axis presents the number of participants.
